# Supplementary material for: Spatial dysregulation of T follicular helper cells impairs vaccine responses in aging
Source: Springer Nature journal article supplement (doi:10.1038/s41590-023-01519-9), 2023-05-22
Supplement: MOESM1 [file 41590_2023_1519_MOESM1_ESM.pdf]

# Spatial dysregulation of T follicular helper cells impairs vaccine responses in aging

In the format provided by the  
authors and unedited

## Supplementary Information File

Supplementary Figure 1

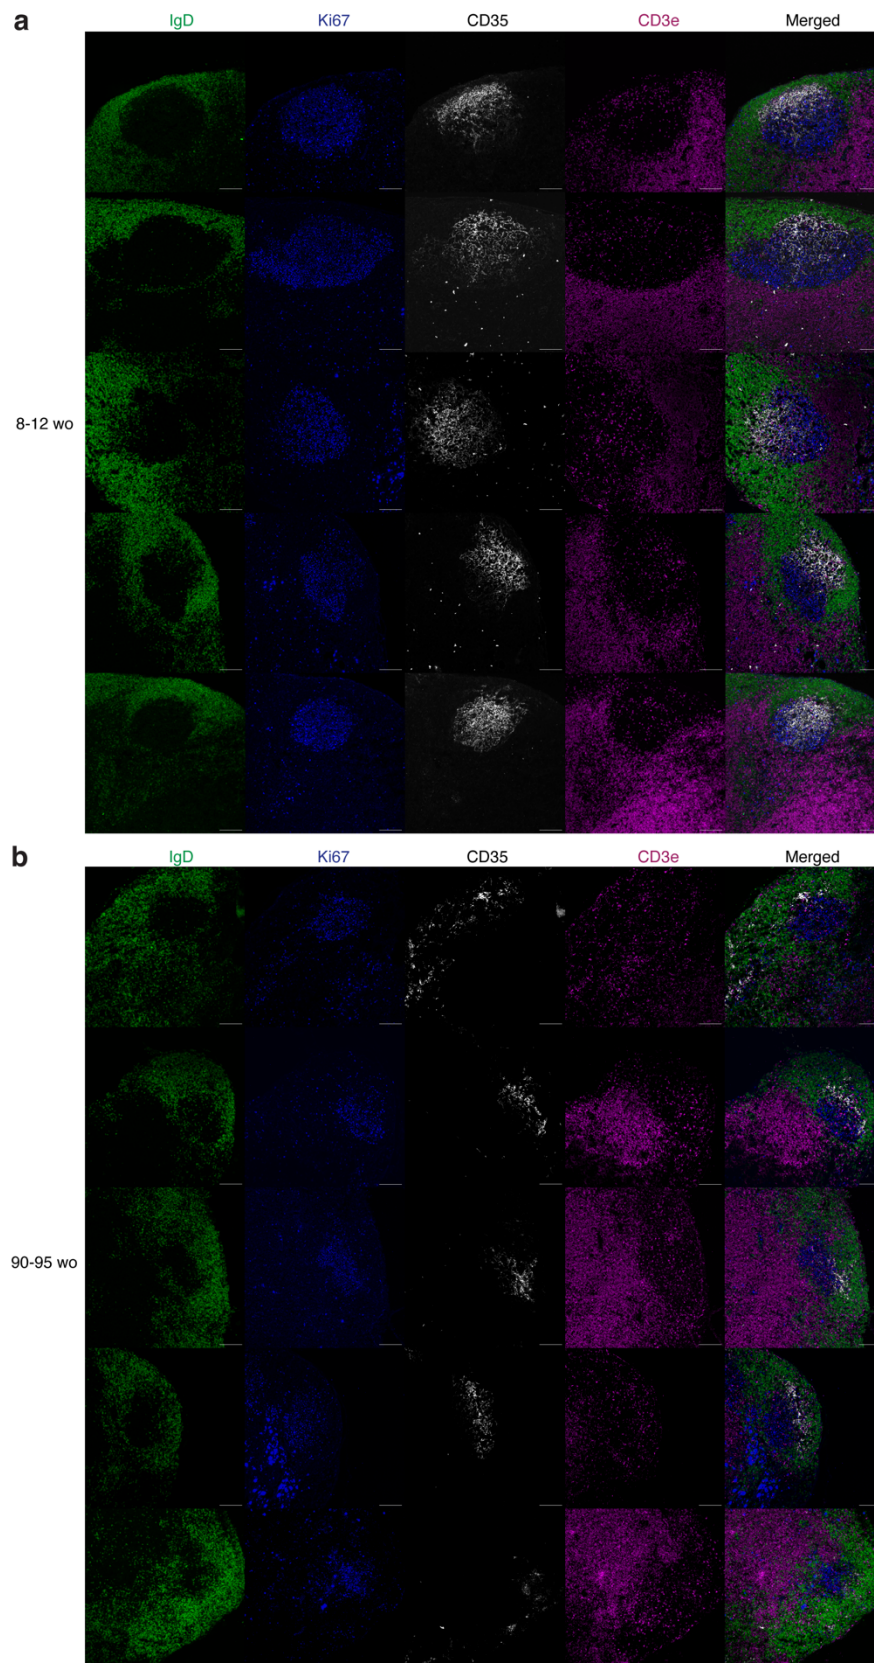

**Supplementary Figure 1| Additional confocal images of GCs from iLNs of BALB/c**

Additional representative confocal images of GCs from iLNs of different 8-12 week-old adult **(a)** and 90-95 week-old aged **(b)** BALB/c mice at 20x magnification where the scale bar is 100µm. Sections were stained for IgD (green), CD35 (white), Ki67 (blue) and CD3 (magenta). Data is representative of four independent experiments.

Supplementary Figure 2

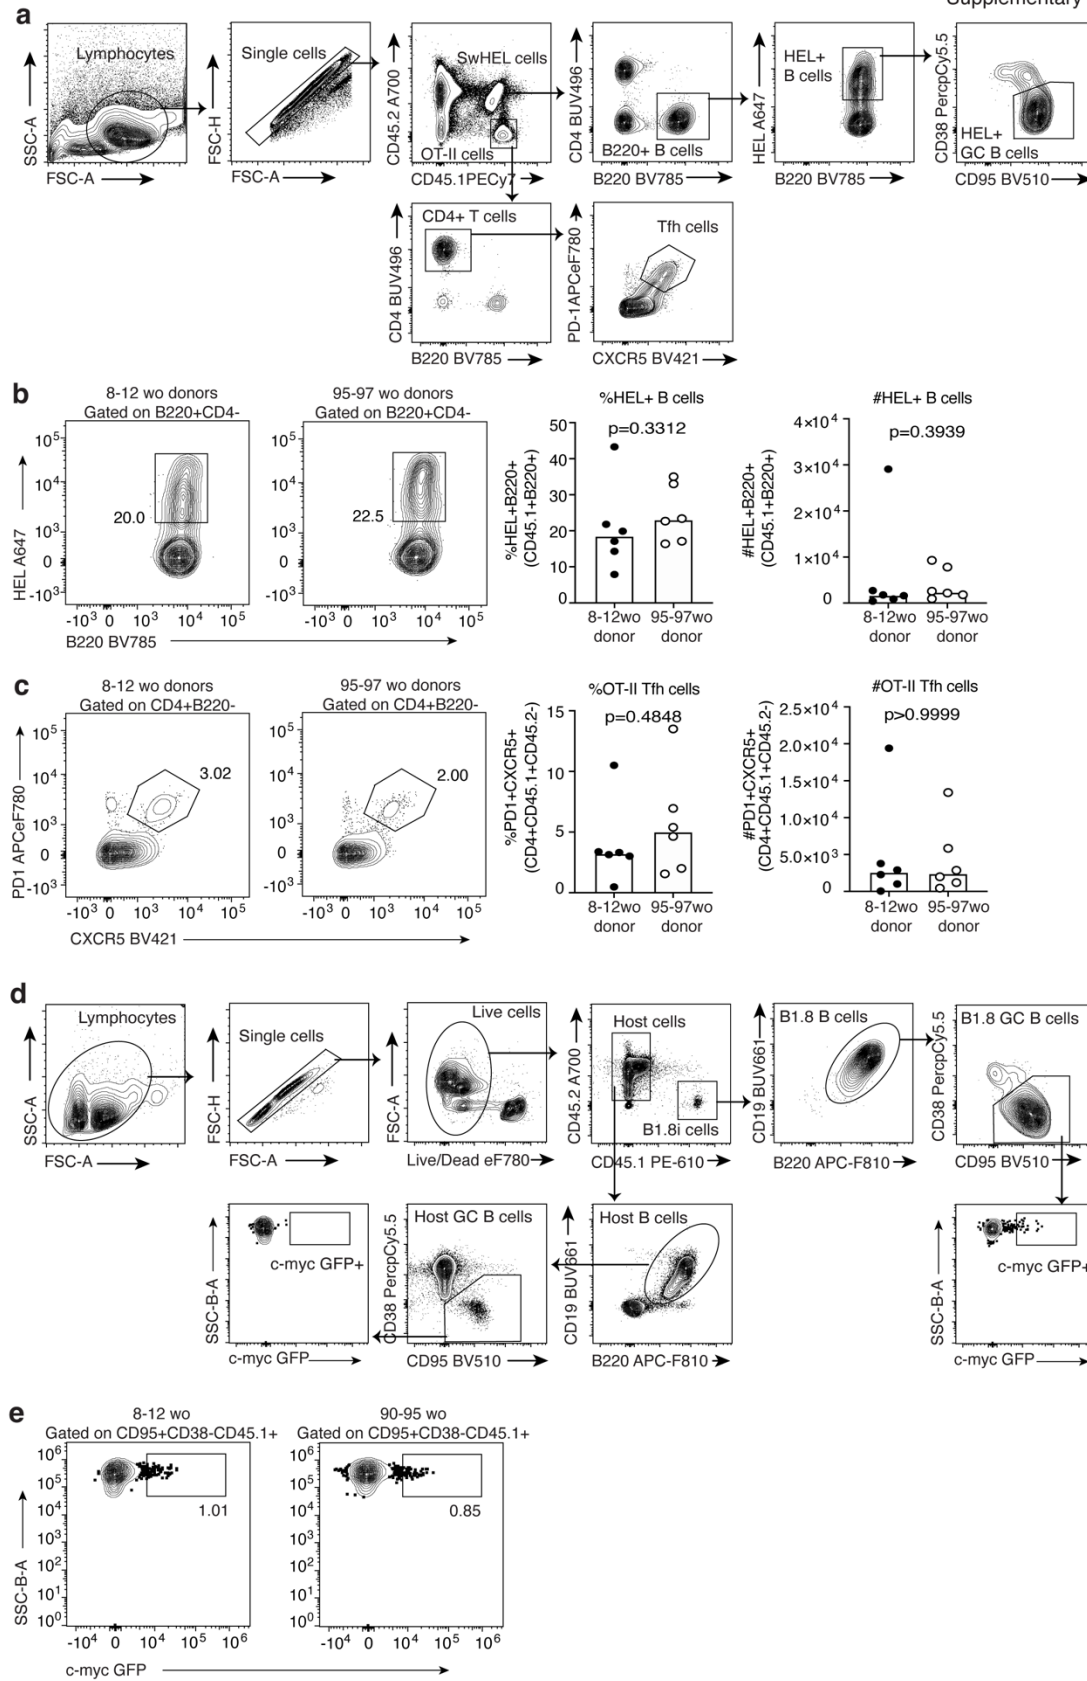



**Supplementary Figure 2| Co-transfer of SW<sub>HEL</sub> B cells and OT-II T cells into adult C57BL/6 mice and Adoptive transfer of B1-8i B cells into adult and aged C57BL/6 mice**

(a) Gating strategy for the analysis of transferred HEL-binding SW<sub>HEL</sub> B cells, SW<sub>HEL</sub> derived GC B cells and OT-II derived Tfh cells in the iLNs of adult C57BL/6 recipient mice 10 days after immunisation with HEL-OVA in alum. (b) Representative flow cytometry plots and quantification of transferred HEL-binding B cells (HEL<sup>+</sup>B220<sup>+</sup>CD45.1<sup>+</sup>CD45.2<sup>+</sup>) in adult C57BL/6 recipients from adult and aged donors. (c) Representative flow cytometry plots and quantification of the OT-II derived Tfh cells (PD1<sup>+</sup>CXCR5<sup>+</sup>CD4<sup>+</sup>CD45.1<sup>+</sup>CD45.2<sup>-</sup>) in adult C57BL/6 recipients from adult and aged donors. The values next to the gates on flow cytometry plots indicate the population percentage. The data is representative of three independent experiments (n=12) where each symbol represents a mouse, and the bar height represents the median. The p-values were obtained by performing an unpaired, two-tailed Mann-Whitney U test. (d) Gating strategy for identifying c-Myc<sup>+</sup>CD95<sup>+</sup>CD38<sup>+</sup>B220<sup>+</sup>CD19<sup>+</sup>CD45.1<sup>+</sup>B1-8<sup>+</sup> germinal centre B cells after adoptive transfer into adult and aged mice and immunisation with NP-OVA in alum. (e) Representative flow cytometric contour plots of c-myc GFP expression in B1-8i derived GC B cells in young or aged mice. The values next to the gates on flow cytometry plots indicate the population percentage.

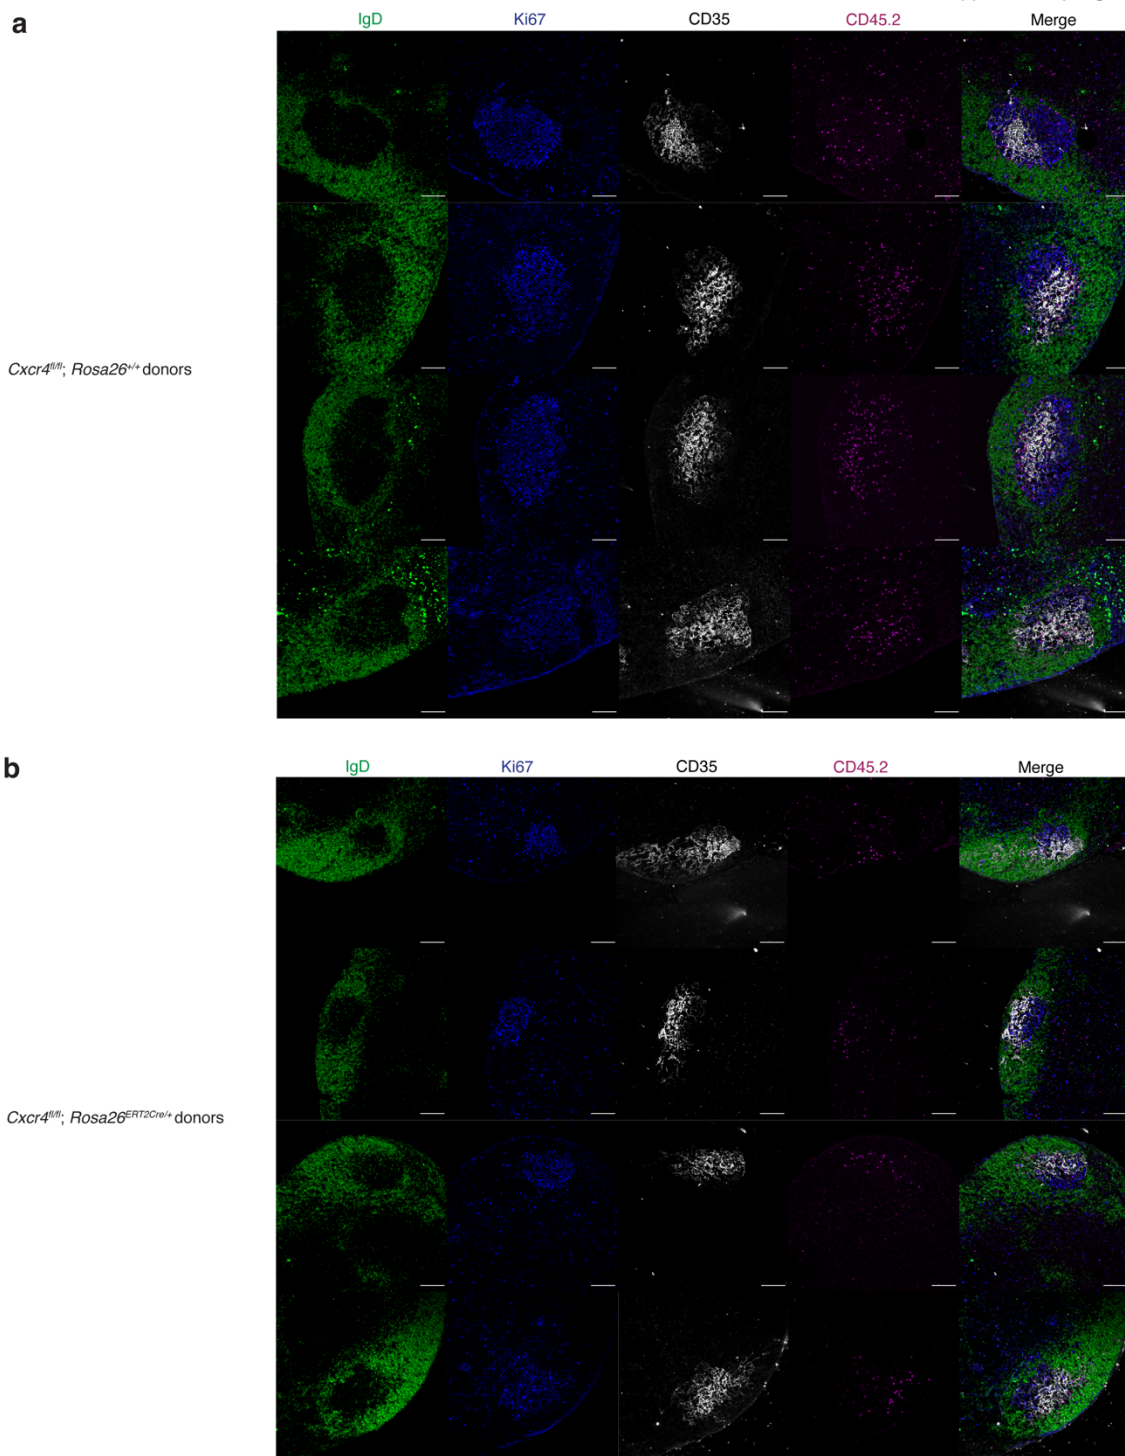

**Supplementary Figure 3| Deletion of CXCR4 on T cells determines their location within the GC.** Additional representative confocal images of the GCs from the iLNs of B6SJL mice which received tamoxifen-treated OT-II cells from either *Cxcr4<sup>fl/fl</sup>; Rosa26<sup>+/+</sup>* **(a)** or *Cxcr4<sup>fl/fl</sup>; Rosa26<sup>ERT2Cre/+</sup>* **(b)** mice; scale bars are 100µm. LN sections were stained for IgD (green), CD35 (white), Ki67 (blue) and CD45.2 (magenta). The data are representative of two independent experiments.

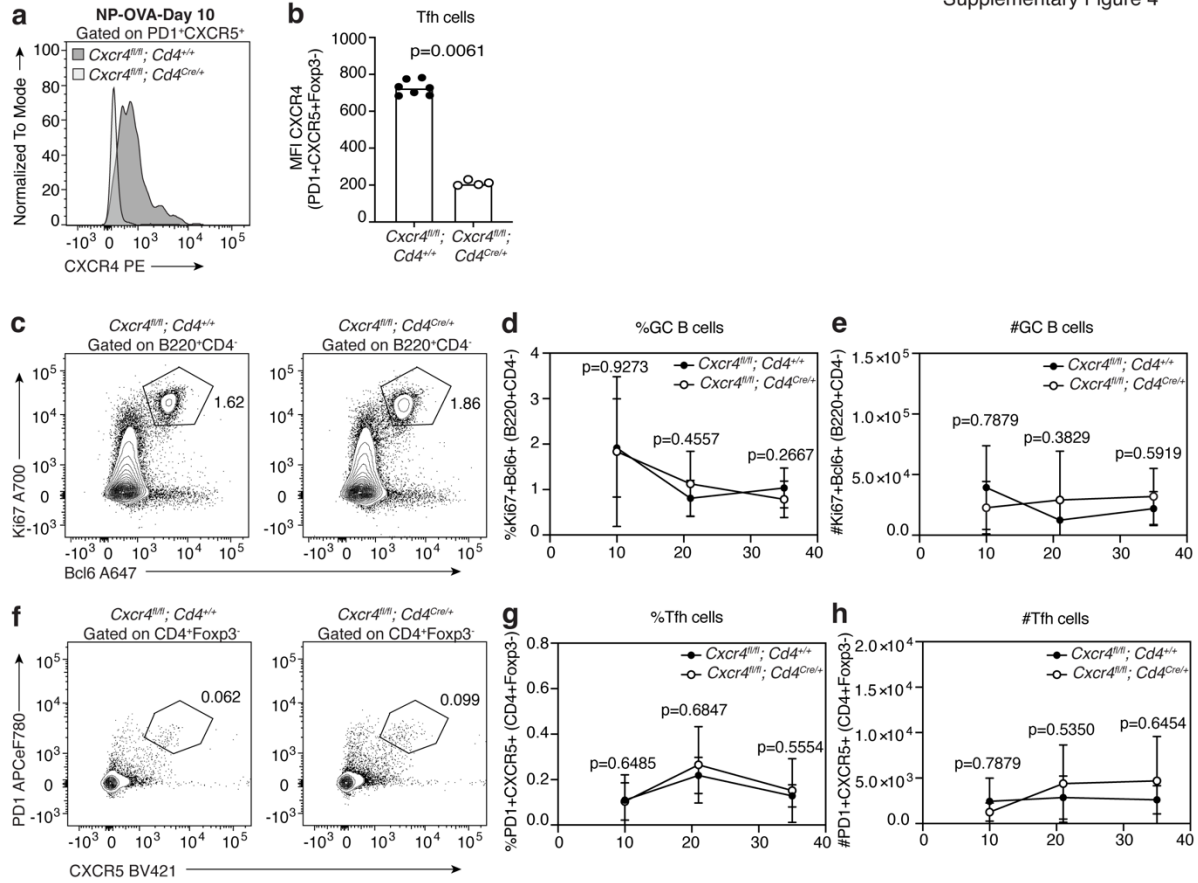

### Supplementary Figure 4| CD4<sup>+</sup> T cell-specific deletion of CXCR4, flow cytometric analysis of immunised *Cxcr4<sup>fl/fl</sup>; Cd4<sup>Cre/+</sup>* mice

**(a)** Representative flow cytometry plot indicating the expression of CXCR4 by PD1<sup>+</sup>CXCR5<sup>+</sup>Foxp3<sup>-</sup> Tfh cells in iLNs of *Cxcr4<sup>fl/fl</sup>; Cd4<sup>+/+</sup>* or *Cxcr4<sup>fl/fl</sup>; Cd4<sup>Cre/+</sup>* mice 10 days after NP-OVA immunisation. **(b)** Median fluorescence intensity (MFI) of CXCR4 by PD1<sup>+</sup>CXCR5<sup>+</sup>Foxp3<sup>-</sup> Tfh cells of *Cxcr4<sup>fl/fl</sup>; Cd4<sup>+/+</sup>* or *Cxcr4<sup>fl/fl</sup>; Cd4<sup>Cre/+</sup>* mice. Bar height on graphs is indicative of the median, each symbol represents a mouse and p-values were obtained by performing an unpaired, two-tailed Mann-Whitney U test. The data are representative of two independent experiments (n=11). **(c)** Representative flow cytometry plots identifying Ki67<sup>+</sup>Bcl6<sup>+</sup> GC B cells 10 days after NP-OVA immunisation of *Cxcr4<sup>fl/fl</sup>; Cd4<sup>+/+</sup>* (left) and *Cxcr4<sup>fl/fl</sup>; Cd4<sup>Cre/+</sup>* (right) mice; values adjacent to gates indicate percentages. Quantification of the percentage **(d)** and total number **(e)** of Ki67<sup>+</sup>Bcl6<sup>+</sup> GC B cells at days 10, 21 and 35 after NP-OVA immunisation of *Cxcr4<sup>fl/fl</sup>; Cd4<sup>+/+</sup>* and *Cxcr4<sup>fl/fl</sup>; Cd4<sup>Cre/+</sup>* mice. **(f)** Representative flow cytometry plots identifying PD1<sup>+</sup>CXCR5<sup>+</sup> Tfh cells 10 days after NP-OVA immunisation of *Cxcr4<sup>fl/fl</sup>; Cd4<sup>+/+</sup>* (left) and *Cxcr4<sup>fl/fl</sup>; Cd4<sup>Cre/+</sup>* (right) mice; values adjacent to gates indicate percentages. Quantification of the percentage **(g)** and total number **(h)** of PD1<sup>+</sup>CXCR5<sup>+</sup> Tfh cells at days 10, 21 and 35 after NP-OVA immunisation of *Cxcr4<sup>fl/fl</sup>; Cd4<sup>+/+</sup>* and *Cxcr4<sup>fl/fl</sup>; Cd4<sup>Cre/+</sup>* mice. The data is representative of two independent experiments (n=14) where each symbol represents the mean  $\pm$  SD and p-values were generated by performing a two-way ANOVA with Sidak's multiple comparisons test.

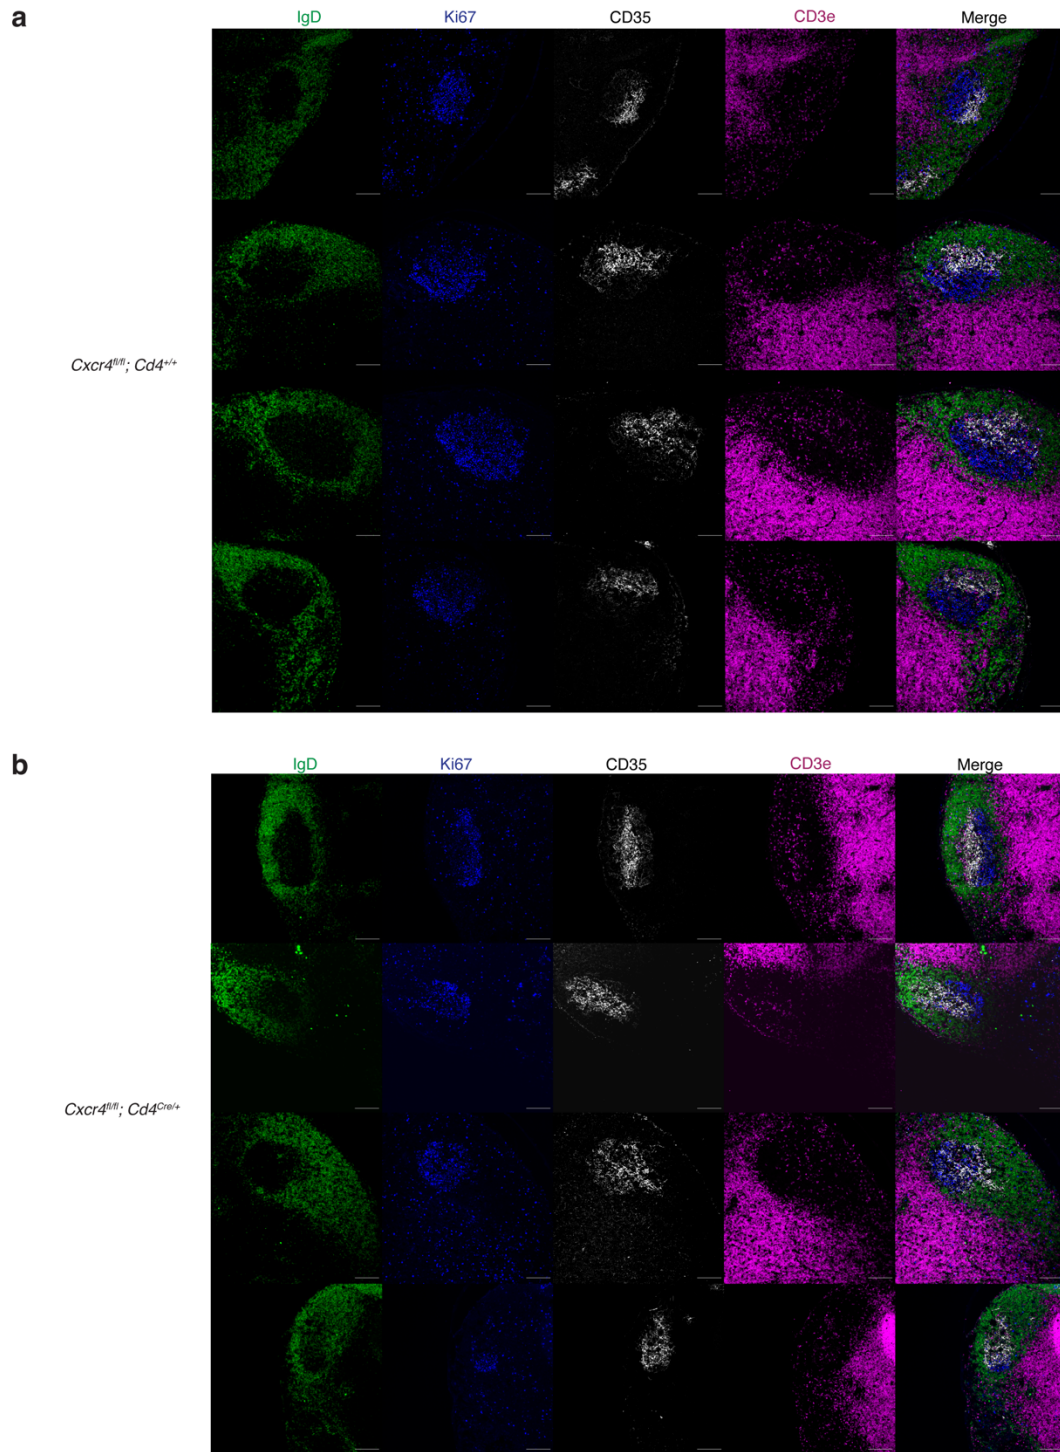

**Supplementary Figure 5| Confocal imaging of immunised *Cxcr4<sup>fl/fl</sup>; Cd4<sup>Cre/+</sup>* mice**

Additional representative confocal images of GCs at day 10 post-immunisation with NP-OVA from iLNs of different control *Cxcr4<sup>fl/fl</sup>; Cd4<sup>+/+</sup>* (**a**) and *Cxcr4<sup>fl/fl</sup>; Cd4<sup>Cre/+</sup>* (**b**) mice. Images were taken at 20x magnification and the scale bars are 100µm. Sections were stained for IgD (green), CD35 (white), Ki67 (blue) and CD3e (magenta). Data is representative of two independent experiments.



Supplementary Figure 6

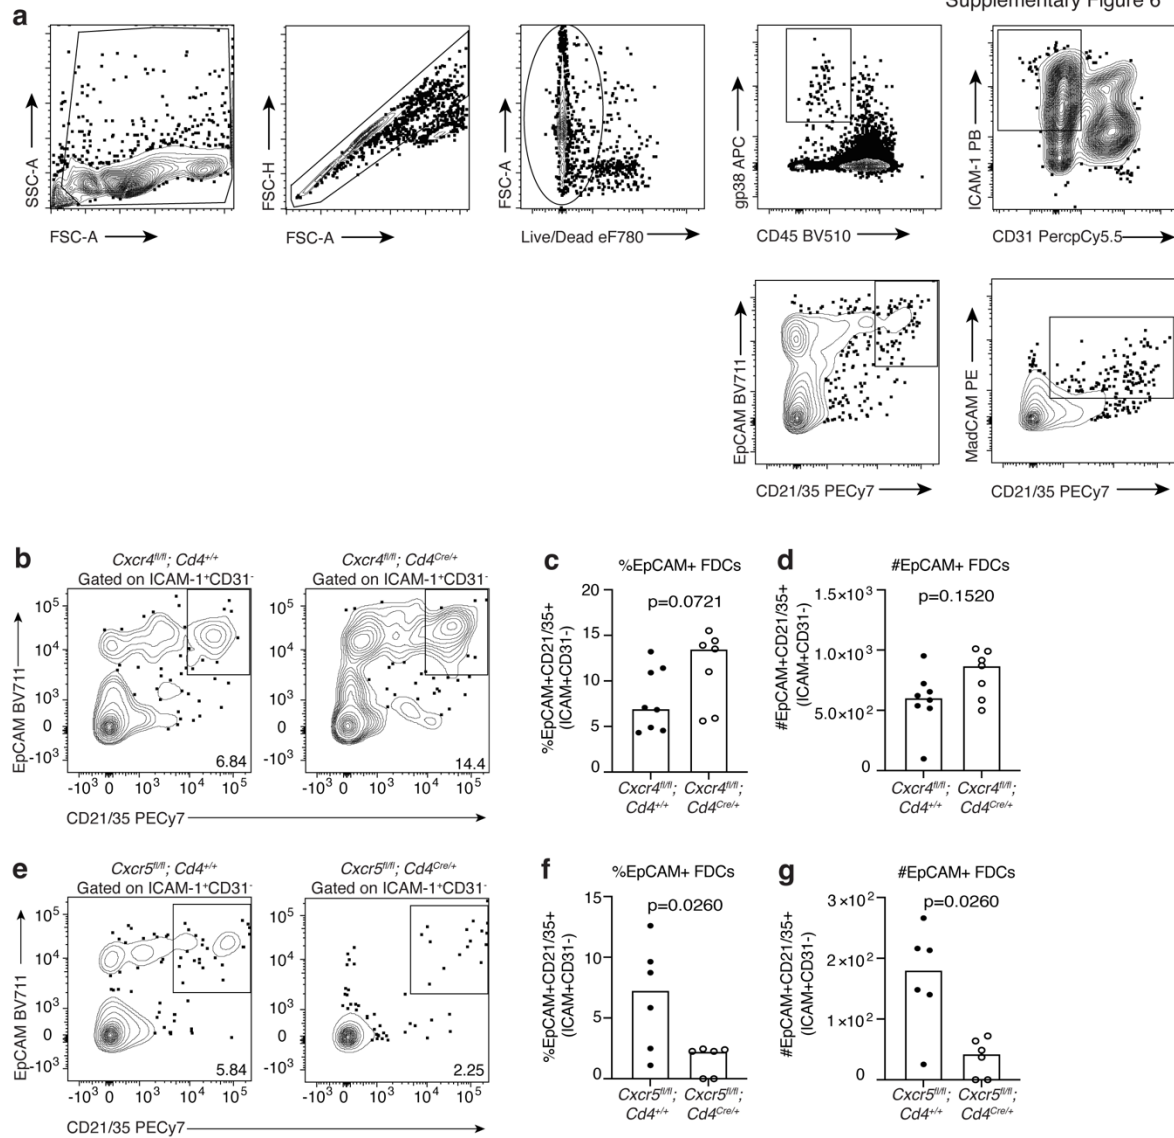

### Supplementary Figure 6 | Stromal cell staining in *Cxcr4<sup>fl/fl</sup>; Cd4<sup>Cre/+</sup>* and *Cxcr5<sup>fl/fl</sup>; Cd4<sup>Cre/+</sup>* mice

(a) Gating strategy for the analysis of MadCAM<sup>+</sup>CD21/35<sup>+</sup> and EpCAM<sup>+</sup>CD21/35<sup>+</sup> FDCs cells in *Cxcr4<sup>fl/fl</sup>; Cd4<sup>Cre/+</sup>* and *Cxcr5<sup>fl/fl</sup>; Cd4<sup>Cre/+</sup>* mice 10 days after NP-OVA immunisation. (b) Representative flow cytometry plots indicating EpCAM<sup>+</sup>CD21/35<sup>+</sup> FDCs in *Cxcr4<sup>fl/fl</sup>; Cd4<sup>+/+</sup>* (left) and *Cxcr4<sup>fl/fl</sup>; Cd4<sup>Cre/+</sup>* (right) mice. Quantification of the percentage (c) and total number (d) of EpCAM<sup>+</sup>CD21/35<sup>+</sup> FDCs in *Cxcr4<sup>fl/fl</sup>; Cd4<sup>+/+</sup>* and *Cxcr4<sup>fl/fl</sup>; Cd4<sup>Cre/+</sup>* mice (n=15). (e) Representative flow cytometry plots indicating EpCAM<sup>+</sup>CD21/35<sup>+</sup> FDCs in *Cxcr5<sup>fl/fl</sup>; Cd4<sup>+/+</sup>* (left) and *Cxcr5<sup>fl/fl</sup>; Cd4<sup>Cre/+</sup>* (right) mice. Quantification of the percentage (f) and total number (g) of EpCAM<sup>+</sup>CD21/35<sup>+</sup> FDCs in *Cxcr5<sup>fl/fl</sup>; Cd4<sup>+/+</sup>* and *Cxcr5<sup>fl/fl</sup>; Cd4<sup>Cre/+</sup>* mice (n=12). Bar height on graphs is indicative of the median, each symbol represents a mouse and p-values were obtained by performing an unpaired, two-tailed Mann-Whitney U test. The data are representative of two independent experiments.

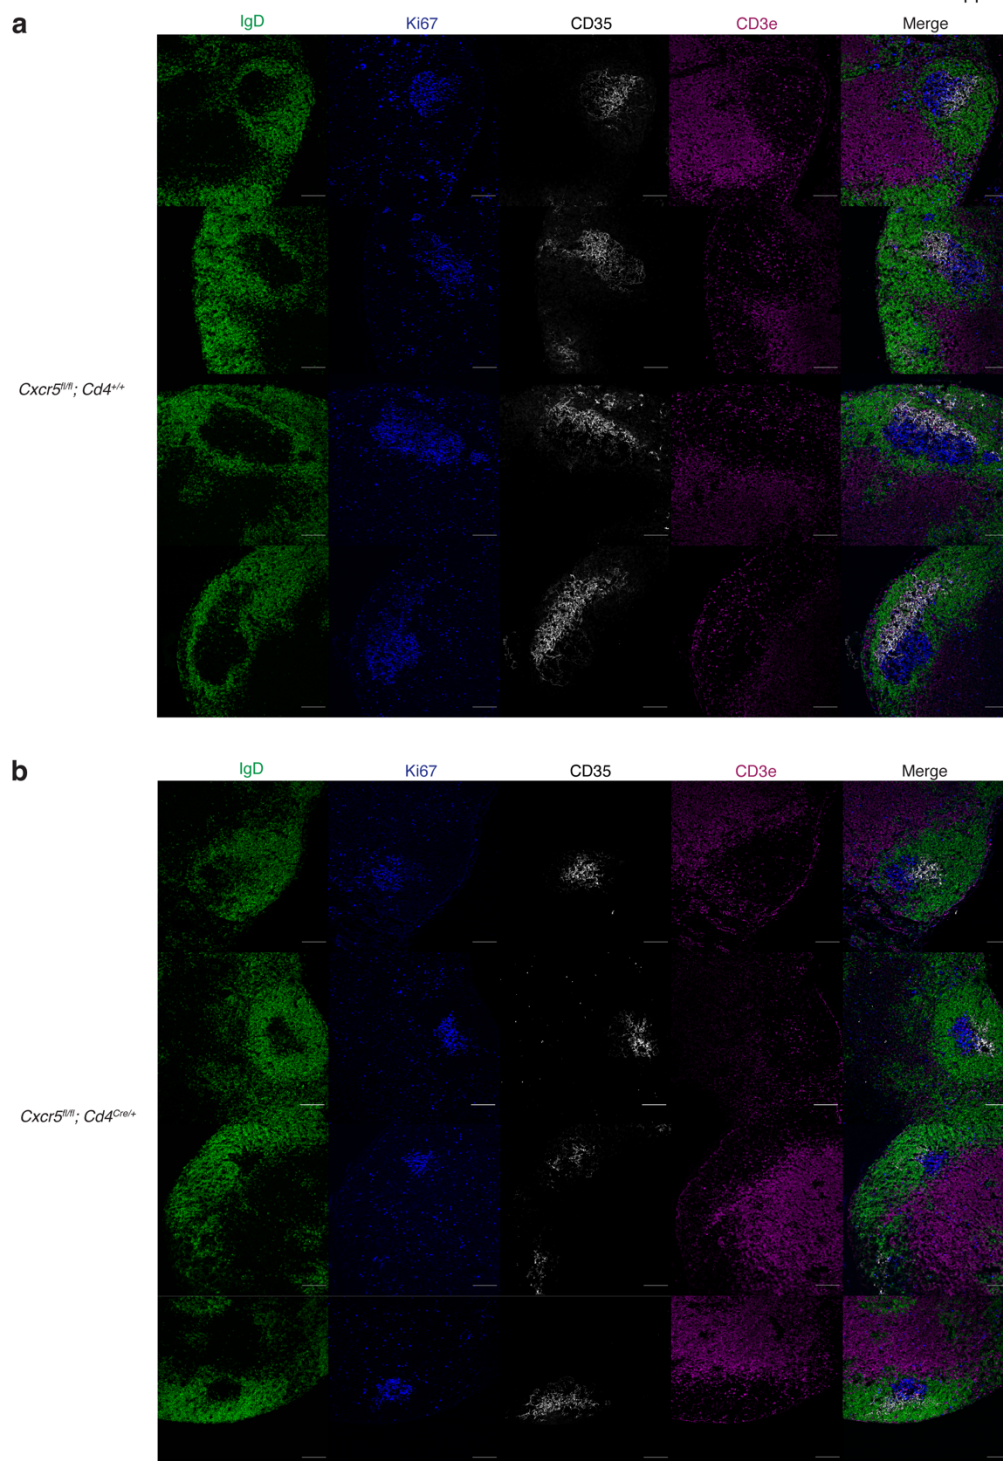

**Supplementary Figure 7| Confocal images of immunised *Cxcr5<sup>fl/fl</sup>; Cd4<sup>Cre/+</sup>* mice**

Additional representative confocal images of GCs at day 10 post-immunisation with NP-OVA from iLNs of different control **(a)** *Cxcr5<sup>fl/fl</sup>; Cd4<sup>+/+</sup>* or **(b)** *Cxcr5<sup>fl/fl</sup>; Cd4<sup>Cre/+</sup>* mice. Images were taken at 20x magnification and the scale bars are 100µm. Sections were stained for IgD (green), CD35 (white), Ki67 (blue) and CD3e (magenta). Data is representative of two independent experiments.



Supplementary Figure 8

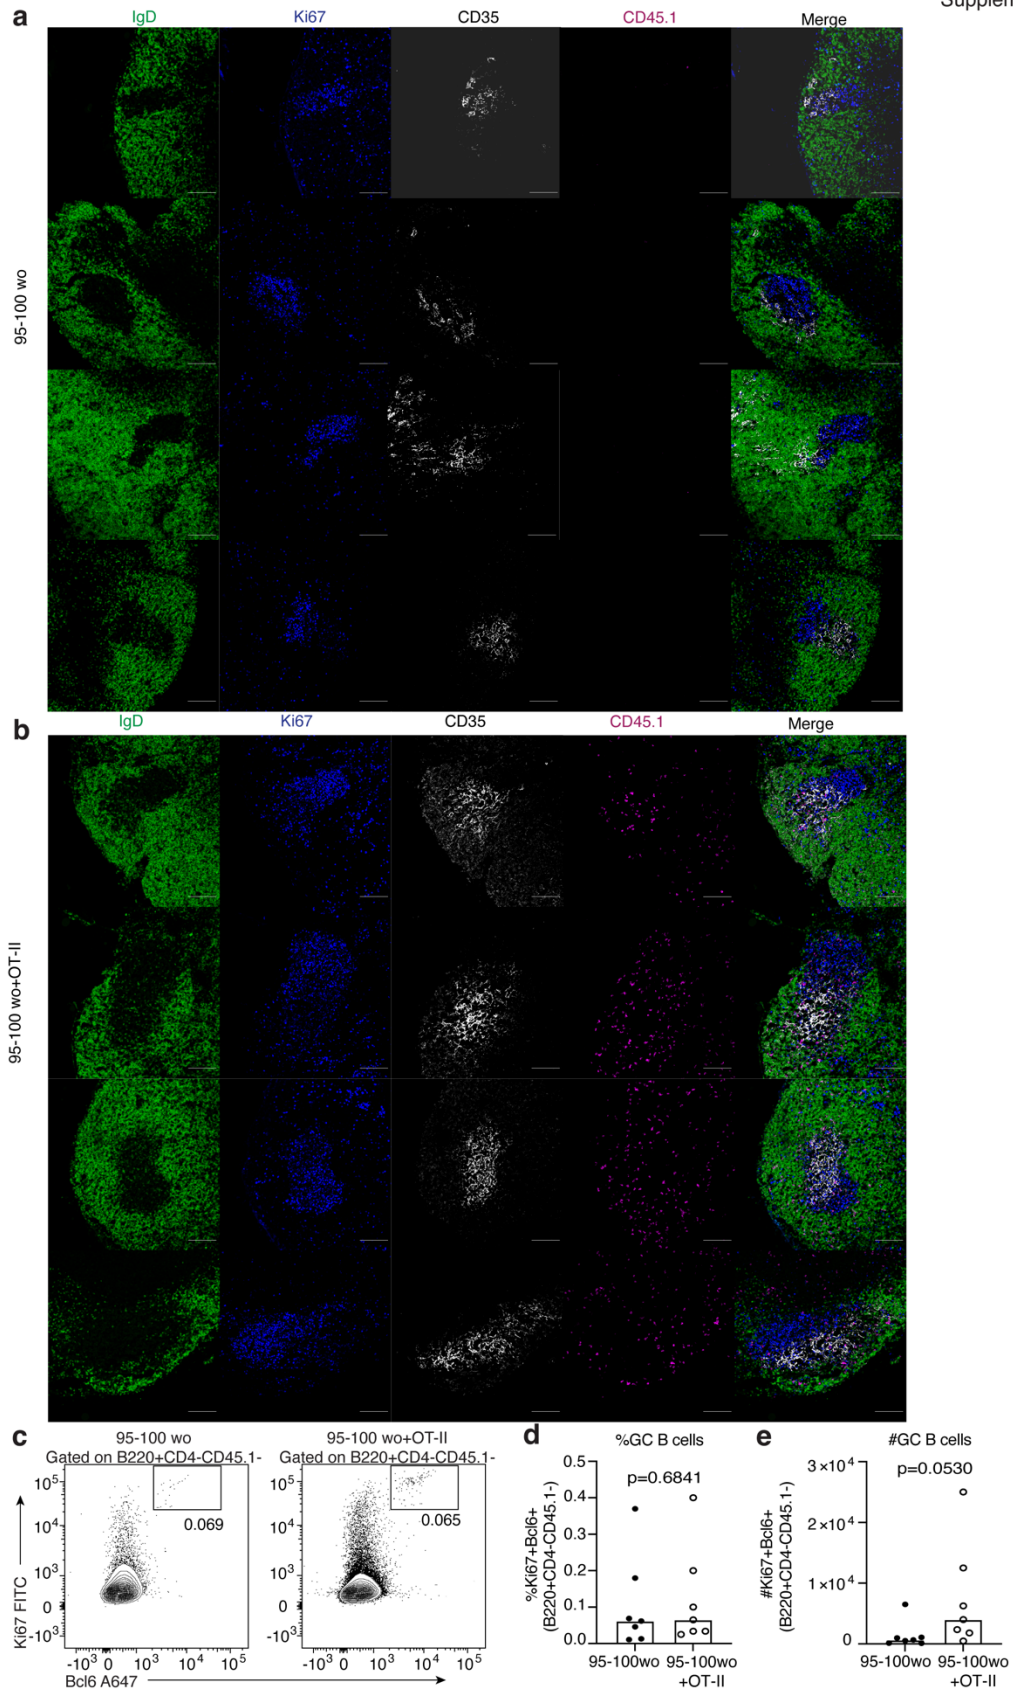

### **Supplementary Figure 8| Confocal images of iLNs from aged**

Additional representative confocal images of GCs from iLNs of different 95-100 week-old aged C57BL/6 mice which received either **(a)** PBS or **(b)** purified OT-II cells from a younger adult OT-II mouse. Images were taken at 20x magnification where the scale bars are 100µm. Sections were stained for IgD (green), CD35 (white) and Ki67 (blue). **(c)** Representative flow cytometry plots and the percentage **(d)** and total number **(e)** of Ki67<sup>+</sup>Bcl6<sup>+</sup> GC B cells in aged C57BL/6 mice, 7 days after NP-OVA immunisation, which received either an injection of PBS (left) or CD4<sup>+</sup> OT-II T cells (right); values adjacent to gates indicate percentage. Bar height on graphs indicates the median, each symbol represents a mouse (n=14), and p-values were obtained by performing an unpaired, two-tailed Mann-Whitney U test. Data are representative of two independent experiments.

**a**

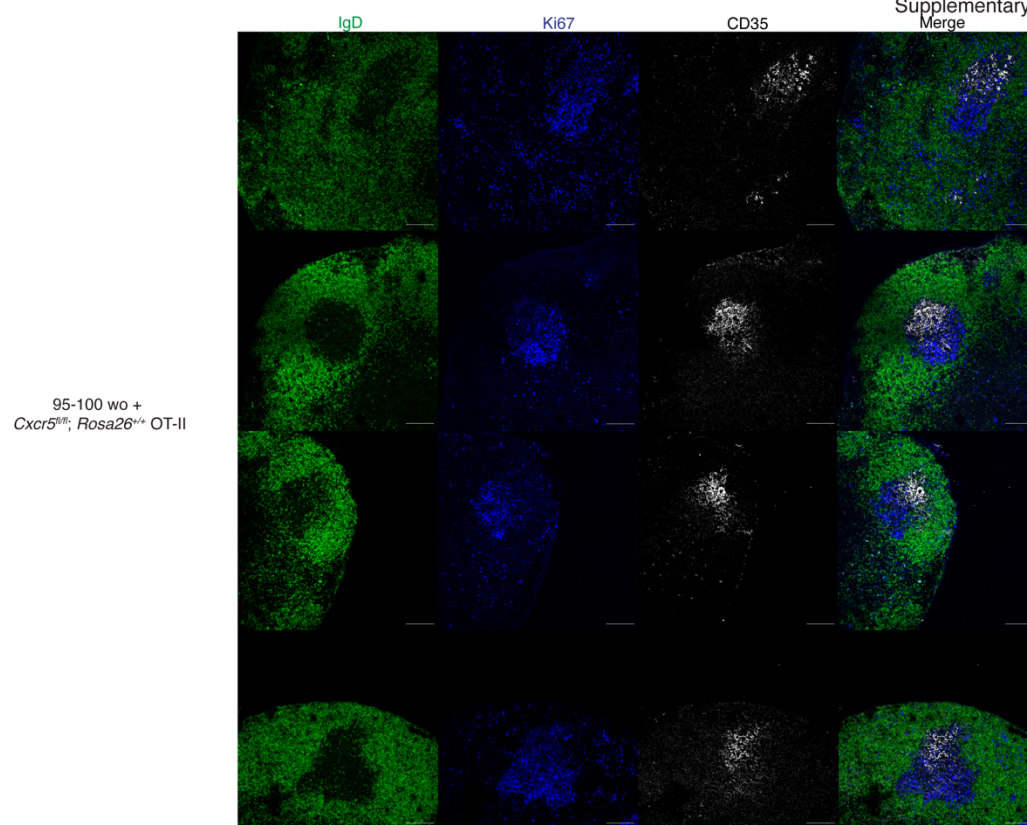

**b**

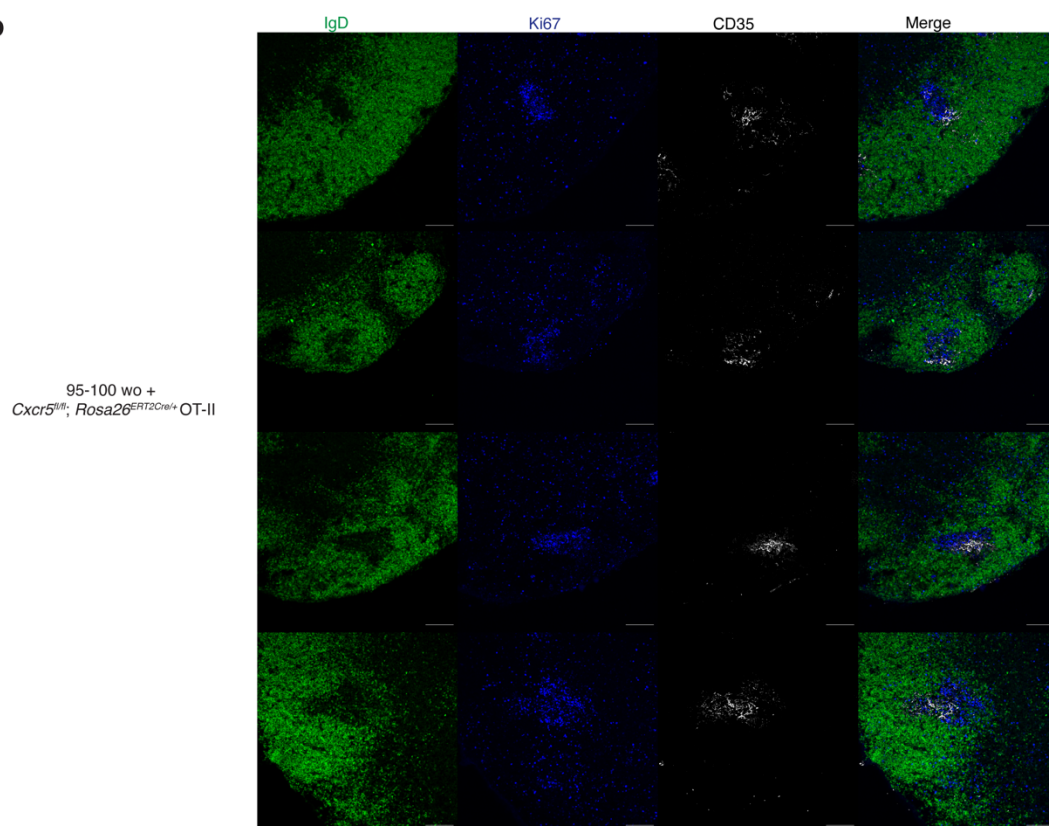

**Supplementary Figure 9| Additional confocal images of GCs from iLNs of aged C57BL/6 mice which received *Cxcr5*<sup>fl/fl</sup>; *Rosa26*<sup>ERT2Cre</sup> OT-II cells**

Additional representative confocal images of GCs from iLNs of different 95-100 week-old aged C57BL/6 mice which received either (a) *Cxcr5*<sup>fl/fl</sup>; *Rosa26*<sup>+/+</sup> OT-II cells or (b) *Cxcr5*<sup>fl/fl</sup>; *Rosa26*<sup>ERT2Cre/+</sup> OT-II cells. Images were taken at 20x magnification where the scale bars are 100µm. Sections were stained for IgD (green), CD35 (white) and Ki67 (blue). Data is representative of two independent experiments.

**Supplementary Table 1| Antibodies used for flow cytometric analysis of primary murine cells.**

| <b>Antigen</b>    | <b>Fluorochrome</b> | <b>Clone</b> | <b>Vendor</b> |
|-------------------|---------------------|--------------|---------------|
| B220              | APCFire810          | RA3-6B2      | BioLegend     |
| B220              | BV510               | RA3-6B2      | BioLegend     |
| B220              | BV785               | RA3-6B2      | BioLegend     |
| Bcl-6             | A647                | K112-91      | BD            |
| Bcl-6             | BV421               | K112-91      | BD            |
| Bcl-6             | PE-Cy7              | K112-91      | BD            |
| CD4               | APC                 | GK1.5        | eBioscience   |
| CD4               | BUV395              | GK1.5        | BD            |
| CD4               | BUV496              | GK1.5        | BD            |
| CD4               | BV510               | RM4-5        | BioLegend     |
| CD4               | BV605               | RM4-5        | BioLegend     |
| CD4               | PE-Fire640          | GK1.5        | BioLegend     |
| CD4               | SV538               | GK1.5        | BioLegend     |
| CD19              | BUV661              | 1D3          | BD            |
| CD31              | PerCPCy5.5          | MEC13.3      | BioLegend     |
| CD38              | eF450               | 90           | eBioscience   |
| CD38              | PerCP-Cy5.5         | 90           | eBioscience   |
| CD44              | BV510               | IM7          | BioLegend     |
| CD44              | PerCP-Cy5.5         | IM7          | BioLegend     |
| CD45              | BV510               | 30-F11       | BioLegend     |
| CD45.1            | A700                | A20          | BioLegend     |
| CD45.1            | PE eFluor610        | A20          | eBioscience   |
| CD45.1            | PE-Cy7              | A20          | eBioscience   |
| CD45.2            | A700                | 104          | eBioscience   |
| CD45.2            | PerCP-Cy5.5         | 104          | eBioscience   |
| CD54 (ICAM)       | PacBlue             | YN1/1.7.4    | BioLegend     |
| CD86              | APC                 | GL-1         | eBioscience   |
| CD90.2            | AF790               | 30-H12       | BioLegend     |
| CD95              | BV510               | Jo2          | BD            |
| CD95              | PE-Cy7              | Jo2          | BD            |
| CXCR4             | APC                 | L276F12      | BioLegend     |
| CXCR4             | BUV563              | 2B11         | BD            |
| CXCR4             | PE                  | L276F12      | BioLegend     |
| CXCR4             | PerCP-eF710         | 2B11         | eBioscience   |
| CXCR5             | APC                 | L138D7       | BioLegend     |
| CXCR5             | BV421               | L138D7       | BioLegend     |
| CXCR5             | BV785               | L138D7       | BioLegend     |
| DEVED-FMK (Casp3) | FITC                | -            | eBioscience   |
| EpCAM-1           | BV711               | G8.8         | BioLegend     |
| Foxp3             | APC                 | FJK-16S      | eBioscience   |
| Foxp3             | AF488               | FJK-16s      | eBioscience   |
| Foxp3             | PE-Cy5.5            | FJK-16s      | eBioscience   |
| GL7               | AF488               | GL7          | eBioscience   |
| GR1               | APC                 | RB6-8C5      | eBioscience   |
| Gp38              | APC                 | 8.1.1        | BioLegend     |

|                    |               |          |                           |
|--------------------|---------------|----------|---------------------------|
| HEL                | A647          | -        | Conjugated in house       |
| IgG1               | BV605         | A85-1    | BD                        |
| IgM                | APC           | R6-60.2  | BD                        |
| Ki67               | AF700         | SolA15   | eBioscience               |
| Ki67               | APC eF780     | SolA15   | eBioscience               |
| Ki67               | FITC          | SolA15   | eBioscience               |
| MadCAM-1           | PE            | MECA-367 | BioLegend                 |
| NP                 | PE            | -        | Biosearch<br>Technologies |
| CD21/35            | PE-Cy7        | eBio8D9  | eBioscience               |
| PD-1               | FITC          | RMP1-30  | BioLegend                 |
| PD-1               | APC eF780     | J43      | eBioscience               |
| PD-1               | BUV615        | RMP1-30  | BD                        |
| PD-1               | PE-Cy7        | RMP1-30  | BioLegend                 |
| TCR V $\alpha$ 2   | APC           | B20.1    | eBioscience               |
| Cell viability dye | Aqua (525/50) | -        | eBioscience               |
| Cell Viability Dye | Blue (450/50) | -        | eBioscience               |
| Cell Trace Violet  | eF450         | -        | eBioscience               |



**Supplementary Table 2|Human antibodies and viability dye used for flow cytometric analysis**

| Antigen            | Fluorochrome | Clone    | Catalogue No. | Vendor          |
|--------------------|--------------|----------|---------------|-----------------|
| CXCR4              | PE/Cy5       | 12GS     | 306507        | BioLegend       |
| CD45RA             | SB570        | F8-11-13 | MCA88SBV570   | BioRad          |
| CD4                | BUV496       | M-T477   | 50175         | BD Biosciences  |
| CD3                | SparkBlue550 | SK7      | 344851        | BioLegend       |
| CD19               | BUV615       | HIB19    | 751273        | BD Biosciences  |
| Cell viability dye | ViaKrome808  | -        | C36628        | Beckman Coulter |

**Supplementary Table 3| Primary antibodies used for immunofluorescence staining of lymph node sections**

| Species | Reactivity       | Antigen        | Conjugation | Clone      | Vendor          |
|---------|------------------|----------------|-------------|------------|-----------------|
| Rat     | Anti-mouse       | IgD            | FITC        | 11-26c.2a  | BioLegend       |
| Rat     | Anti-mouse       | IgD            | AF647       | 11-26c.2a  | BioLegend       |
| Hamster | Anti-mouse       | CD3e           | APC         | 17A2       | BioLegend       |
| Hamster | Anti-mouse       | CD3e           | Purified    | 500A       | Thermo Fisher   |
| Rat     | Anti-mouse       | CD35           | Biotin      | 8C12       | BD              |
| Rabbit  | Anti-mouse       | Ki67           | Purified    | Polyclonal | Abcam           |
| Rat     | Anti-mouse       | Ki67           | FITC        | SolA15     | Thermo Fisher   |
| Rat     | Anti-mouse       | Ki67           | eF450       | SolA15     | eBioscience     |
| Rat     | Anti-mouse       | CD45.2         | A700        | 104        | eBioscience     |
| Rat     | Anti-mouse       | CD45.1         | BV605       | A20        | BioLegend       |
| Mouse   | -                | IgG1 (isotype) | AF647       | 11711      | R&D             |
| Mouse   | Anti-mouse/human | CXCL12/SDF-1   | AF647       | 79018      | R&D             |
| Rat     | Anti-mouse       | CD21/35        | Purified    | 7G6        | BD              |
| Rat     | Anti-mouse       | IgD            | AF488       | 11-26      | SouthernBiotech |
| Rat     | Anti-mouse       | IgD            | AF488       | 11-26c.2a  | Biolegend       |
| Rat     | Anti-mouse       | CD16/32        | BV421       | 190909     | BD              |
| Rat     | Anti-mouse       | CD4            | Dylight550  | GK1.4      | BIOTREND        |
| Rat     | Anti-mouse/human | GL7            | AF647       | GL7        | Biolegend       |

**Supplementary Table 4| Secondary antibodies used for immunofluorescence staining of lymph node sections**

| Species | Reactivity  | Antigen | Conjugation        | Clone      | Vendor        |
|---------|-------------|---------|--------------------|------------|---------------|
| Goat    | Anti-rabbit | IgG     | AF568              | Polyclonal | Thermo Fisher |
| Goat    | Anti-rat    | IgG     | AF555              | Polyclonal | Thermo Fisher |
| -       | Biotin      | -       | Streptavidin AF568 | -          | Thermo Fisher |
| -       | Biotin      | -       | Streptavidin BV421 | -          | BioLegend     |

**Supplementary Table 5| List of parameters used for *in silico* modelling of the aged GC response**

| Parameter name            | Value | Description                                                                |
|---------------------------|-------|----------------------------------------------------------------------------|
| FDC number                | 200   | Total number of FDCs                                                       |
| Percentage of FDC network | 50    | Percentage of the FDC network volume within the total GC volume            |
| northweight               | 0.1   | Tendency for Tc to stay in the light zone (polarity weight range from 0-1) |
